# Supplementary material for: Single-Layered Phase-Change Metasurfaces Achieving Polarization- and Crystallinity-Dependent Wavefront Manipulation
Source: MDPI journal article supplement (doi:10.3390/photonics10030344), 2023-03-22
Supplement: s1 [file s1]

# Single-Layered Phase-Change Metasurfaces Achieving Polarization- and Crystallinity-Dependent Wavefront Manipulation

(Supporting Information)

Table S1 Geometric parameters and corresponding optical responses at A- and C- state

| $i$ | $j$                     | 1    | 2    | 3    | 4    | 5    | 6    |
|-----|-------------------------|------|------|------|------|------|------|
|     |                         |      |      |      |      |      |      |
| 1   | $L(\mu\text{m})$        | 4.4  | 4.4  | 4.3  | 3.7  | 3.5  | 3.2  |
|     | $W(\mu\text{m})$        | 1.9  | 1.8  | 1.85 | 1.95 | 2.15 | 2.2  |
|     | $\varphi_a(\text{deg})$ | -163 | -143 | -149 | -138 | -163 | -150 |
|     | $Cross-A_a$             | 0.94 | 0.96 | 0.96 | 0.9  | 0.74 | 0.61 |
|     | $Co-A_a$                | 0.15 | 0.03 | 0.10 | 0.33 | 0.62 | 0.74 |
|     | $\varphi_c(\text{deg})$ | -125 | -54  | -4   | 61   | 123  | 173  |
|     | $Cross-A_c$             | 0.47 | 0.41 | 0.34 | 0.31 | 0.69 | 0.5  |
|     | $Co-A_c$                | 0.54 | 0.65 | 0.26 | 0.33 | 0.27 | 0.5  |
| 2   | $L(\mu\text{m})$        | 2.85 | 2.7  | 2.75 | 3.7  | 1    | 2.85 |
|     | $W(\mu\text{m})$        | 3.8  | 2.1  | 2    | 1.45 | 2    | 4    |
|     | $\varphi_a(\text{deg})$ | -76  | -99  | -90  | -71  | -109 | -85  |
|     | $Cross-A_a$             | 0.29 | 0.62 | 0.74 | 0.97 | 0.21 | 0.34 |
|     | $Co-A_a$                | 0.89 | 0.72 | 0.61 | 0.22 | 0.97 | 0.86 |
|     | $\varphi_c(\text{deg})$ | -127 | -50  | -16  | 55   | 119  | 180  |
|     | $Cross-A_c$             | 0.56 | 0.41 | 0.4  | 0.53 | 0.72 | 0.66 |
|     | $Co-A_c$                | 0.66 | 0.4  | 0.43 | 0.38 | 0.67 | 0.28 |
| 3   | $L(\mu\text{m})$        | 2.5  | 4.6  | 2.3  | 2.9  | 3.6  | 3.5  |
|     | $W(\mu\text{m})$        | 3.4  | 1.05 | 3    | 1.55 | 1.3  | 1.25 |
|     | $\varphi_a(\text{deg})$ | -27  | -35  | -30  | -34  | -41  | -30  |
|     | $Cross-A_a$             | 0.41 | 0.93 | 0.58 | 0.91 | 0.98 | 0.98 |
|     | $Co-A_a$                | 0.89 | 0.13 | 0.37 | 0.35 | 0.03 | 0.09 |
|     | $\varphi_c(\text{deg})$ | -120 | -52  | 5    | 66   | 120  | 169  |
|     | $Cross-A_c$             | 0.58 | 0.76 | 0.5  | 0.41 | 0.67 | 0.63 |
|     | $Co-A_c$                | 0.78 | 0.43 | 0.5  | 0.62 | 0.32 | 0.36 |
| 4   | $L(\mu\text{m})$        | 1.95 | 2.15 | 2.2  | 1.9  | 1.8  | 1.85 |
|     | $W(\mu\text{m})$        | 3.7  | 3.5  | 3.2  | 4.4  | 4.4  | 4.3  |
|     | $\varphi_a(\text{deg})$ | 42   | 17   | 30   | 17   | 37   | 31   |
|     | $Cross-A_a$             | 0.9  | 0.74 | 0.61 | 0.94 | 0.96 | 0.96 |
|     | $Co-A_a$                | 0.33 | 0.62 | 0.74 | 0.15 | 0.03 | 0.1  |
|     | $\varphi_c(\text{deg})$ | -119 | -57  | -7   | 55   | 126  | 176  |
|     | $Cross-A_c$             | 0.31 | 0.69 | 0.5  | 0.47 | 0.41 | 0.34 |
|     | $Co-A_c$                | 0.33 | 0.27 | 0.5  | 0.54 | 0.65 | 0.26 |
| 5   | $L(\mu\text{m})$        | 1.45 | 2    | 4    | 3.8  | 2.1  | 2    |
|     | $W(\mu\text{m})$        | 3.7  | 1    | 2.85 | 2.85 | 2.7  | 2.75 |
|     | $\varphi_a(\text{deg})$ | 109  | 71   | 95   | 104  | 81   | 90   |
|     | $Cross-A_a$             | 0.97 | 0.22 | 0.34 | 0.29 | 0.62 | 0.74 |
|     | $Co-A_a$                | 0.22 | 0.97 | 0.86 | 0.89 | 0.72 | 0.61 |

|   |                         |      |      |      |      |      |      |
|---|-------------------------|------|------|------|------|------|------|
|   | $\varphi_c(\text{deg})$ | -119 | -61  | 0    | 53   | 130  | 164  |
|   | $Cross-A_c$             | 0.53 | 0.72 | 0.66 | 0.56 | 0.41 | 0.4  |
|   | $Co-A_c$                | 0.38 | 0.67 | 0.28 | 0.66 | 0.4  | 0.43 |
| 6 | $L(\mu\text{m})$        | 1.55 | 1.3  | 1.25 | 3.4  | 1.05 | 3    |
|   | $W(\mu\text{m})$        | 2.9  | 3.6  | 3.5  | 2.5  | 4.6  | 2.3  |
|   | $\varphi_a(\text{deg})$ | 146  | 139  | 150  | 153  | 145  | 150  |
|   | $Cross-A_a$             | 0.91 | 0.98 | 0.98 | 0.41 | 0.93 | 0.58 |
|   | $Co-A_a$                | 0.35 | 0.03 | 0.09 | 0.89 | 0.13 | 0.37 |
|   | $\varphi_c(\text{deg})$ | -114 | -60  | -11  | 60   | 128  | 175  |
|   | $Cross-A_c$             | 0.41 | 0.67 | 0.63 | 0.58 | 0.76 | 0.5  |
|   | $Co-A_c$                | 0.62 | 0.32 | 0.36 | 0.78 | 0.43 | 0.5  |

where  $Cross-A_a$  and  $Cross-A_c$  are the cross-polarized amplitude at A- and C- state.  $Co-A_a$  and  $Co-A_c$  are the co-polarized amplitude at A- and C- state.

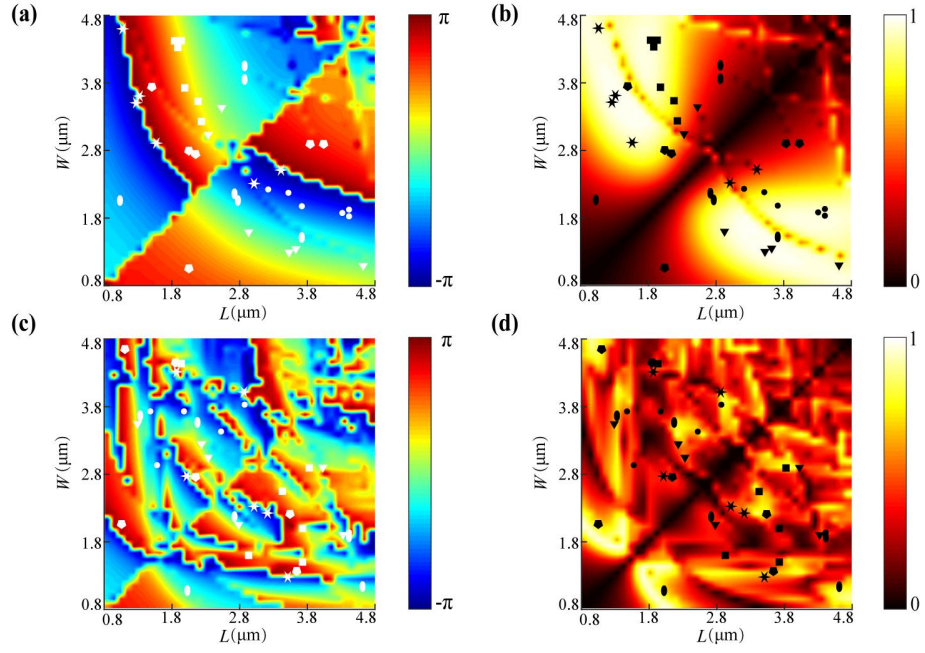

Figure S1. Optimization graphs of the simulated unit cells with different geometries. Phase (a) and amplitude (b) responses when GSST is in A-state. Phase (c) and amplitude (d) responses when GSST is in C-state. The same symbol indicates the same  $i$  in Table S1. It can be inferred that for a given phase shift at A-state, six kinds of meta atoms can be chosen that can fully cover  $0-2\pi$  at C-state.

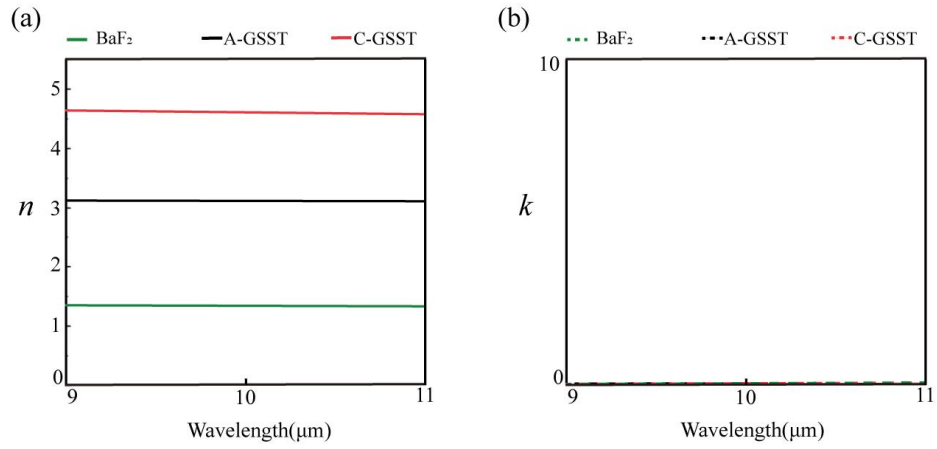

Figure S2. Optical constants data of used materials. (a) Real part of the refractive index. (b) Imaginary part of the refractive index. The Optical constants are obtained from measured results in [1,2].

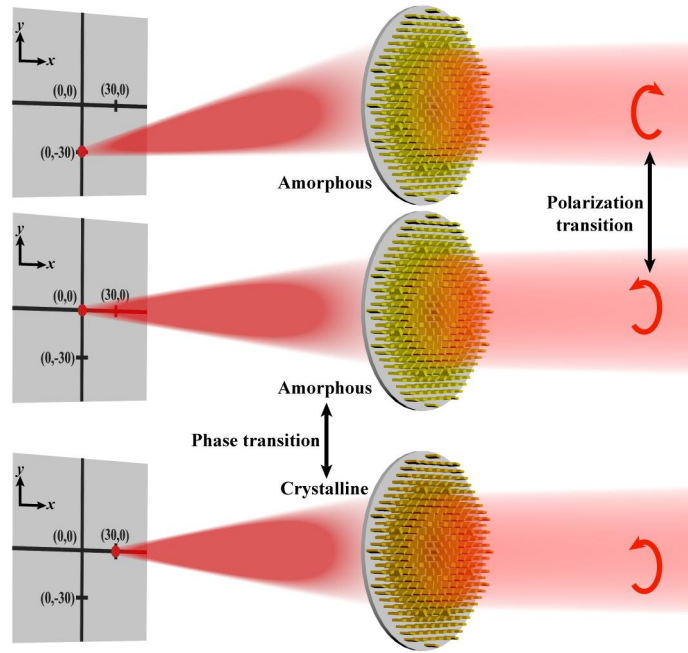

Figure S3. The schematic illustration for the multi-focus metalens.

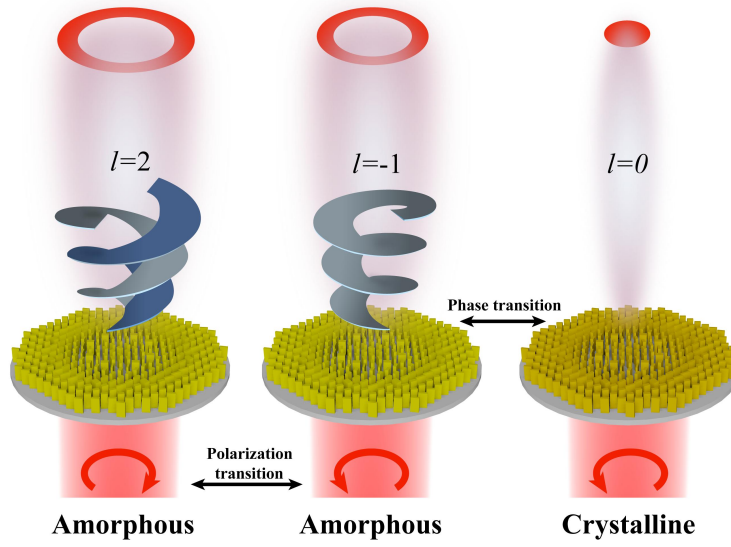

Figure S4. The schematic illustration for the multistate vortex beam generator.

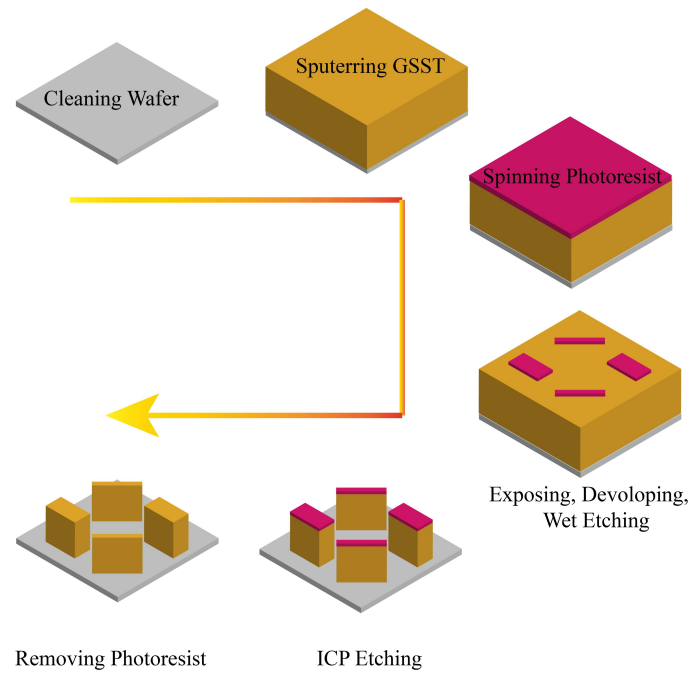

Figure S5. A feasible fabrication process for the designed sample.

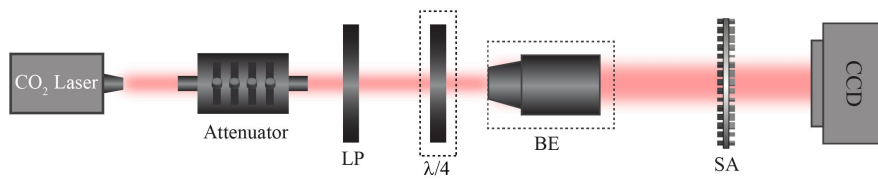

Figure S6. Schematic illustration of the measurement setup. LP: linear polarizer.  $\lambda/4$ : quarter wave plate. BE: beam expander. SA: sample.

#### Reference

1. Zhang, Y.; Chou, J.B.; Li, J.; Li, H.; Du, Q.; Yadav, A.; Zhou, S.; Shalaginov, M.Y.; Fang, Z.; Zhong, H.; et al. Broadband Transparent Optical Phase Change Materials for High-Performance Nonvolatile Photonics. *Nat. Commun.* **2019**, *10*, 4279, doi:10.1038/s41467-019-12196-4.
2. Palik, E.D. *Handbook of Optical Constants of Solids*; Academic press, 1998; Vol. 3; ISBN 0-12-544423-0.
